# Supplementary material for: Cysteine facilitates the lignocellulolytic response of Trichoderma guizhouense NJAU4742 by indirectly up-regulating membrane sugar transporters
Source: Springer Nature journal article supplement (doi:10.1186/s13068-023-02418-9), 2023-10-27
Supplement: MOESM2 [file 13068_2023_2418_MOESM2_ESM.pdf]

**Dataset 1A** is the differentially expressed gene of OE-*TgcysK* and  $\Delta TgcysK$  relative to WT; **Dataset 1B** is the differentially expressed gene of OE-*Tghmt* and  $\Delta Tghmt$  relative to WT.

**Dataset 2A** is the Pull-down protein identified in the control (CON) group, while **Dataset 2B** is the Pull-down protein identified in the experiment (EXP) group.

**Dataset 3** is the mass spectrometry identification result of intracellular substances of hyphae grown under T1 and T2 treatment conditions.
